# Supplementary material
Source: publisher figshare collection journal article supplement (https://acs.figshare.com/ndownloader/files/3874951)
Supplement: Supplementary file 1 [file 3874951]

# SUPPORTING INFORMATION

## Temperature-driven Isosymmetric Reversible Phase Transition in the Hormone Estradiol

### 17 $\beta$ Valerate

Javier Ellena,<sup>†\*</sup> Karina de Paula,<sup>†</sup> Cristiane C. de Melo,<sup>†</sup> Cecília C. P. da Silva,<sup>†</sup> Beatriz P. Bezerra,<sup>††</sup> Tiago Venâncio,<sup>†††</sup> Alejandro P. Ayala<sup>††\*</sup>

<sup>†</sup> Instituto de Física de São Carlos, Universidade de São Paulo, CP 369, 13560-970, São Carlos, SP, Brazil; <sup>††</sup> Departamento de Física, Universidade Federal do Ceará, CP 6030, Fortaleza, Ceará 60455-970; <sup>†††</sup> Departamento de Química, Universidade Federal de São Carlos, Cx Postal 676, 13565-905 São Carlos, SP, Brasil; \* e-mail: [javiere@ifsc.usp.br](mailto:javiere@ifsc.usp.br)

### Intra and Intermolecular Interactions

**Table S1** - Geometrical parameters characterizing the intra and intermolecular interactions of E2V at both temperatures. The symbols "D" and "A" refers to hydrogen donor and acceptors, respectively.

| E2V              | Interaction     | D...H(Å) | D...A(Å) | H...A(Å) | D-H...A(°) | Symmetry code  |
|------------------|-----------------|----------|----------|----------|------------|----------------|
| <b>298K</b>      |                 |          |          |          |            |                |
| Conformer A      | O1A-H1...O3A    | 0.70     | 2.770(6) | 2.08     | 171        | x, y, z+1      |
|                  | C16A-H16B...O2A | 0.80     | 2.517(7) | 2.15     | 108        | intramolecular |
| Conformer B      | O1B-H2...O3B    | 0.81     | 2.799(6) | 1.99     | 171        | x, y, z-1      |
| <b>100.0(2)K</b> |                 |          |          |          |            |                |
| Conformer A      | O1A-H1...O3A    | 0.93     | 2.793(2) | 1.87     | 171        | x, y, -1+z     |
| Conformer B      | O1B-H2...O3B    | 0.82     | 2.780(3) | 2.00     | 158        | 1+x, y, -1+z   |
|                  | C14B-H14...Cg1  | 1.00     | 2.818(4) | 1.790    | 174.99     | -x,-y+1,-z+2   |

Cg1 represents the centroid of the phenyl ring: C1A-C2A-C3A-C4A-C5A-C10A.

### X-ray Powder Diffraction

For comparison, Figure S1 shows the theoretical X-ray powder diffraction pattern of E2V calculated from the single crystal x-ray diffraction experiment at room temperature and 100 K using the MERCURY program and the experimental powder diffractogram at similar

temperatures. Both, experimental and calculated PXRD diagrams can be satisfactorily compared. All peaks from the experimental PXRD pattern overlaid to those observed in the simulated X-ray diffractogram showing that the E2V sample has no extra crystalline phase thus proving the purity of the sample. Also, since no broad hump from amorphous material was observed the powdered sample is completely crystalline. Table S2 lists the most intense reflections of the calculated powder patterns.

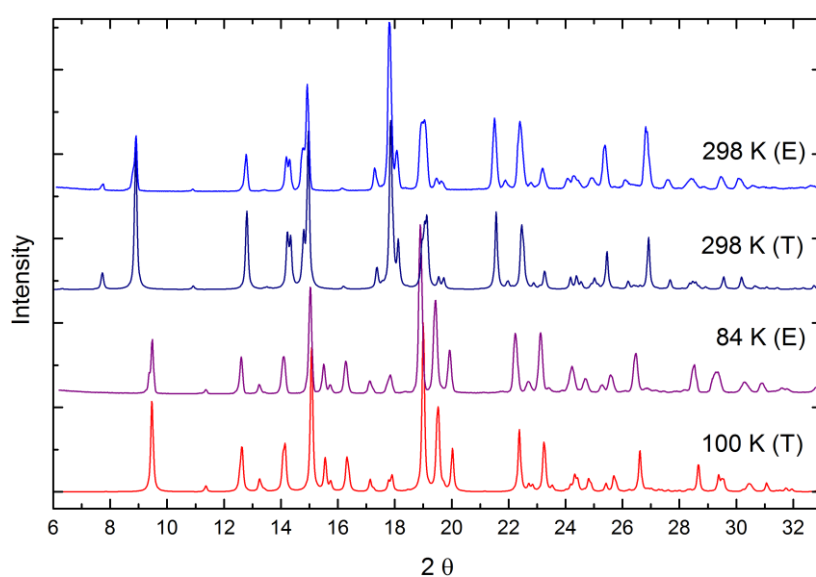

**Figure S1.** Theoretical (T) and experimental (T) PXRD patterns of E2V at room and low temperature.

**Table S2** – Relative intensity of the most intense reflections of the calculated powder patterns.

| 100 K |                        | 298 K  |                        |
|-------|------------------------|--------|------------------------|
| d [Å] | I/I <sub>max</sub> [%] | d [Å]  | I/I <sub>max</sub> [%] |
| 9.331 | 54                     | 11.442 | 8                      |
| 7.008 | 33                     | 9.928  | 71                     |
| 6.672 | 9                      | 6.910  | 39                     |
| 6.267 | 42                     | 6.223  | 25                     |
| 5.870 | 85                     | 6.171  | 25                     |
| 5.694 | 20                     | 5.985  | 26                     |
| 5.424 | 27                     | 5.917  | 77                     |
| 5.169 | 7                      | 5.101  | 12                     |
| 4.984 | 5                      | 4.962  | 100                    |
| 4.951 | 9                      | 4.892  | 27                     |
| 4.667 | 100                    | 4.650  | 83                     |
| 4.544 | 69                     | 4.498  | 5                      |
| 4.431 | 26                     | 4.118  | 39                     |
| 3.969 | 39                     | 4.042  | 5                      |
| 3.823 | 34                     | 3.954  | 46                     |
| 3.654 | 20                     | 3.821  | 10                     |
| 3.583 | 10                     | 3.678  | 5                      |
| 3.462 | 12                     | 3.648  | 6                      |
| 3.347 | 25                     | 3.556  | 9                      |
| 3.111 | 16                     | 3.497  | 18                     |
| 3.038 | 8                      | 3.310  | 25                     |
| 3.023 | 11                     | 3.130  | 10                     |
| 2.932 | 10                     | 3.020  | 6                      |

## Thermal analysis and Spectroscopic Characterization at room temperature.

Figure S2 shows the DSC and TGA curves of E2V above room temperature. The high temperature DSC shows the presence of an endothermic peak with onset temperature around 145°C associated with the melting of the material. TGA shows that the decomposition process of the sample starts at 262°C.

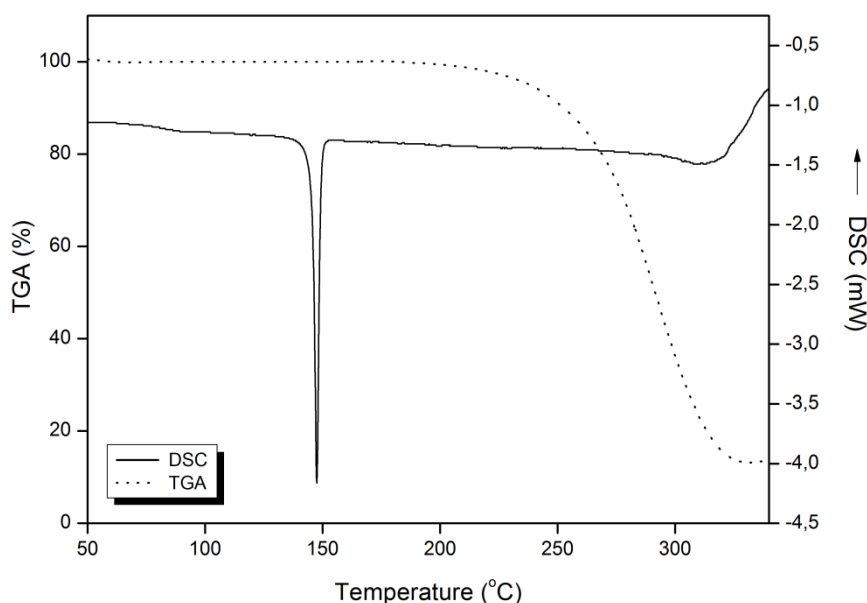

**Figure S2.** DSC and TGA Curves of E2V above room temperature.

## Vibrational spectroscopy

The room temperature infrared and Raman spectra of E2V are presented in Figure S3. The observed bands were divided into regions to facilitate the description.

**High Region (2800-3600cm<sup>-1</sup>):** In this region, we can verify the presence of the OH stretching vibrations. The OH mode of the group involving in the intermolecular hydrogen bond is observed in 3400-3200 cm<sup>-1</sup> characterized as wide and strong in IR and weak in Raman. Besides these bands some Raman modes appear between 2990cm<sup>-1</sup> to 3040cm<sup>-1</sup>

related to the  $sp^2$  aromatics carbons. The modes related to the  $sp^3$  carbons atoms appear just below, between  $2990\text{cm}^{-1}$  to  $2800\text{cm}^{-1}$ .

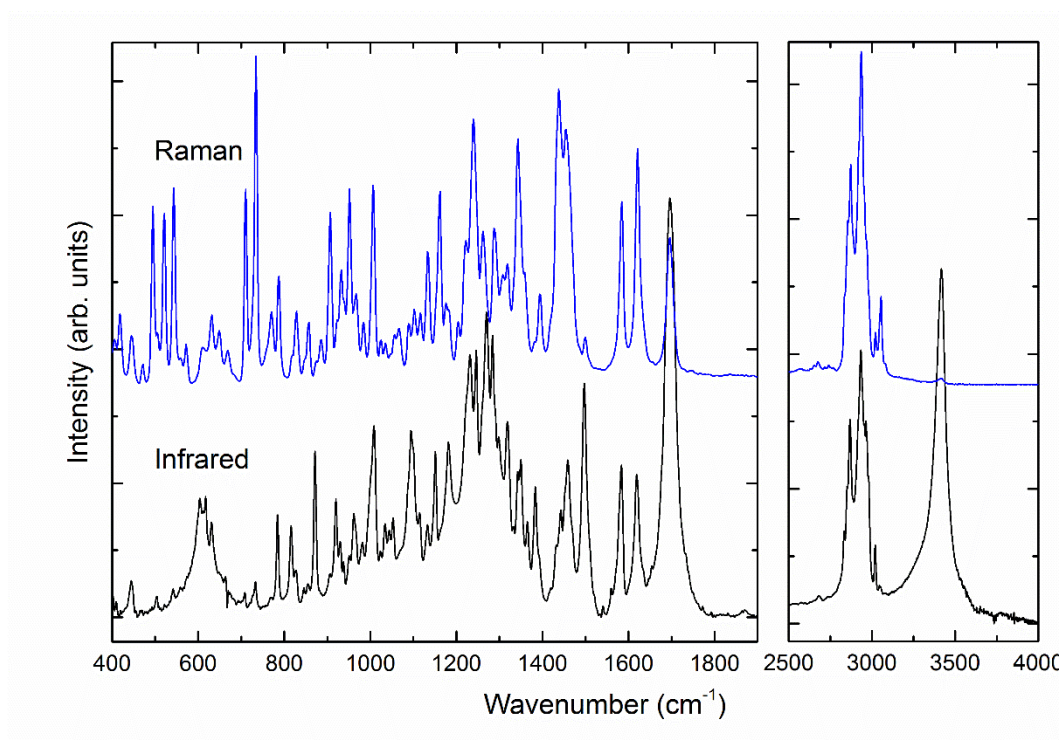

**Figure S3.** Infrared and Raman spectra of E2V at room temperature.

**Average energy region ( $1150\text{-}1700\text{cm}^{-1}$ ):** In this region observed medium to weak bands around  $1740\text{ cm}^{-1}$  in the Raman spectrum which may correspond to the C=O stretching of the ester group. In the  $1410\text{-}1310\text{ cm}^{-1}$  range appears characteristic bands of the phenol group. Furthermore, the stretching band at  $1275\text{-}1185\text{ cm}^{-1}$  it may be attributed to the asymmetric mode of the COC group.

**Low Energy region ( $400\text{-}1100\text{ cm}^{-1}$ ):** In this region the symmetric stretching modes of the ester COC can be identified between  $1150$  and  $1160\text{ cm}^{-1}$  which are weak in the Raman. This region encompasses also other characteristic modes of phenol in the  $720\text{-}600\text{ cm}^{-1}$  regions and  $450\text{-}375\text{ cm}^{-1}$ . The first one refers to the OH out of plane vibrations, that is

medium to weak, and the second involves vibrations in the plane, in which case the bands appear in the Raman as weak.

### Superposition of Molecules in the Asymmetric Unit

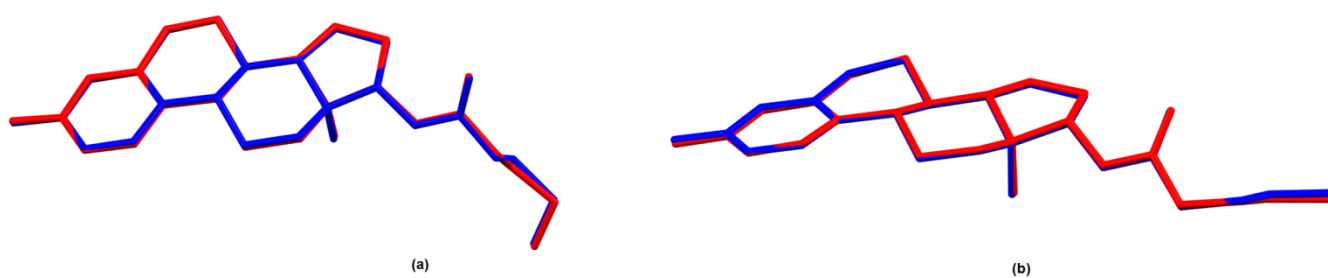

**Figure S4.** Superposition of conformers A in red and B in blue at (a) room temperature and (b) low temperature.

### NMR

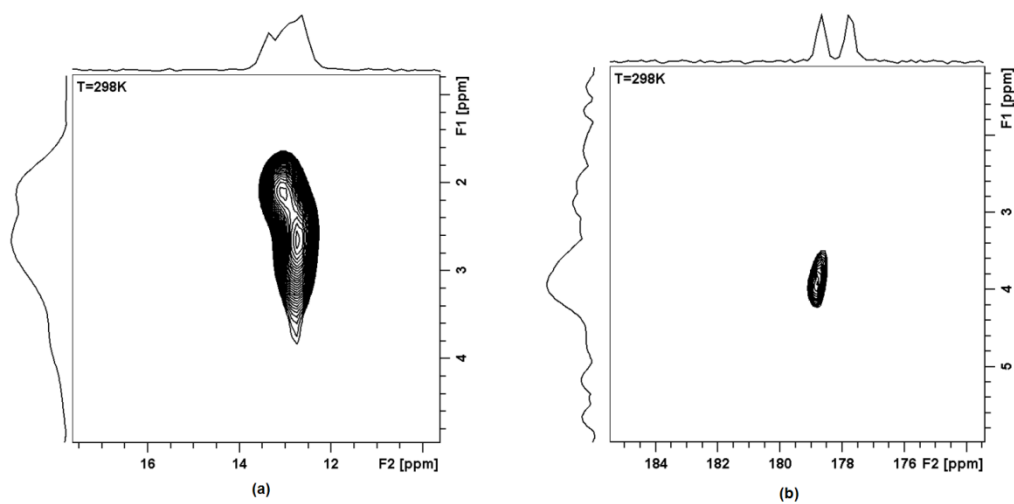

**Figure S5.** 2D  $^1\text{H}$ - $^{13}\text{C}$  FSLG-HETCOR correlation map for E2V at 298K: (a) expansion of methyl groups (C18 and C23); (b) expansion of carbonyl group C19.

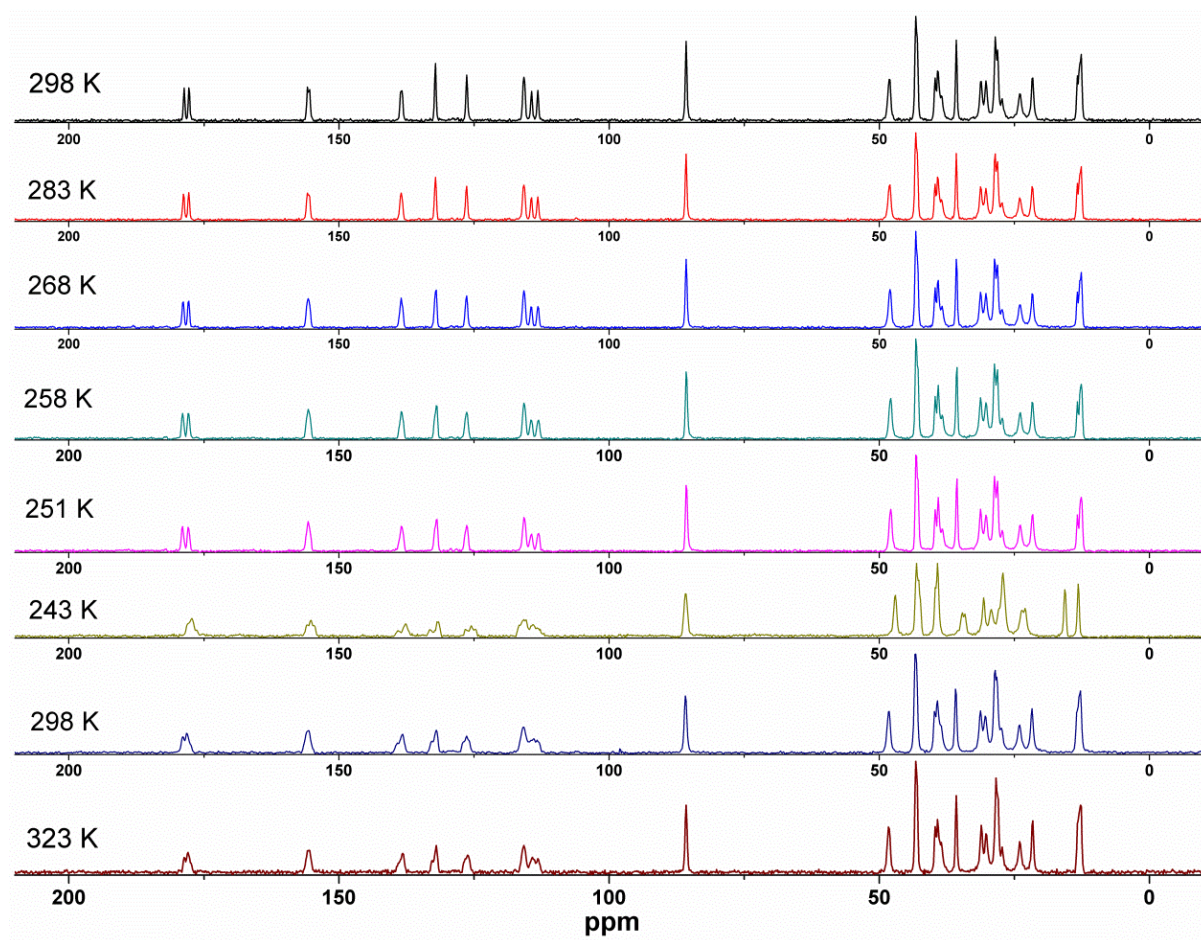

**Figure S6.**  $^{13}\text{C}$  solid state NMR spectra for E2V at different temperatures.

## Low Temperature IR spectra

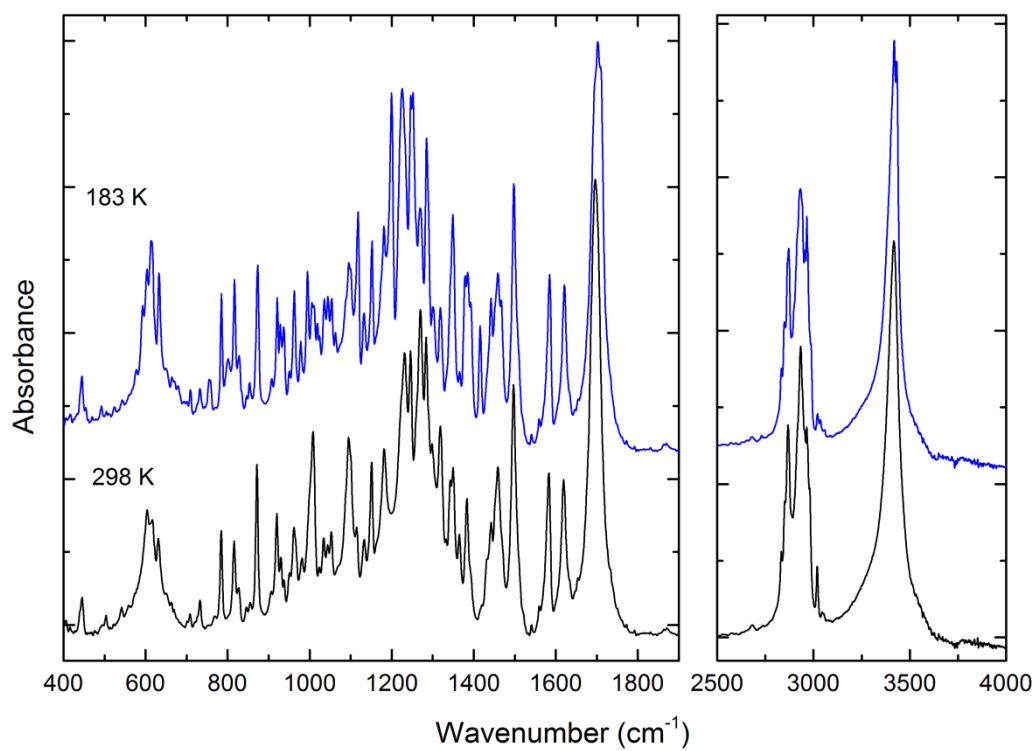

**Figure S7.** Comparison of the room and low temperature infrared spectra.

## Quantum Mechanical Calculations

The electronic structure and optimized geometry of the molecule were computed by *ab initio* DFT using Gaussian 09 program package employing 6-31++G(d,p) basis set based on Becke's three-parameter hybrid exchange functional with Lee-Yang-Parr correlation functional (B3LYP). The basis set 6-311++G(d,p) augmented by d polarization functions on heavy atoms and p polarization functions on hydrogen atoms as well as diffuse functions for both hydrogen and heavy atoms were used for better description of polar bonds C=O and CH<sub>2</sub> groups. The optimized structural parameters were used to calculate the absolute infrared absorption intensities in the harmonic approximation at the DFT level. The positive values of all the obtained wavenumbers confirm the stability of optimized geometry.

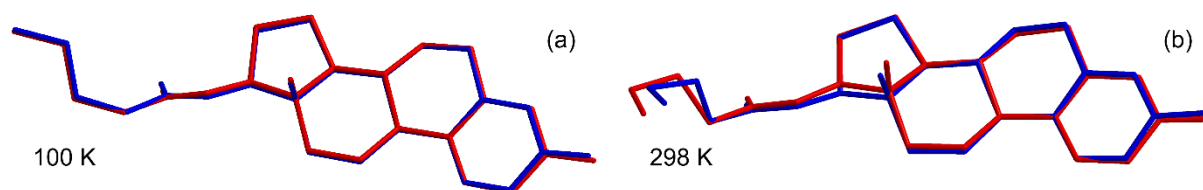

**Figure S8.** Comparison experimental (red) and calculated (blue) molecular conformations of the (a) low and (b) room temperature crystalline structures.
